# Supplementary material
Source: Springer Nature journal article supplement (https://www.springermedizin.de/resource/supplementary/12884_2012_808_MOESM7_ESM.pdf/9458240)

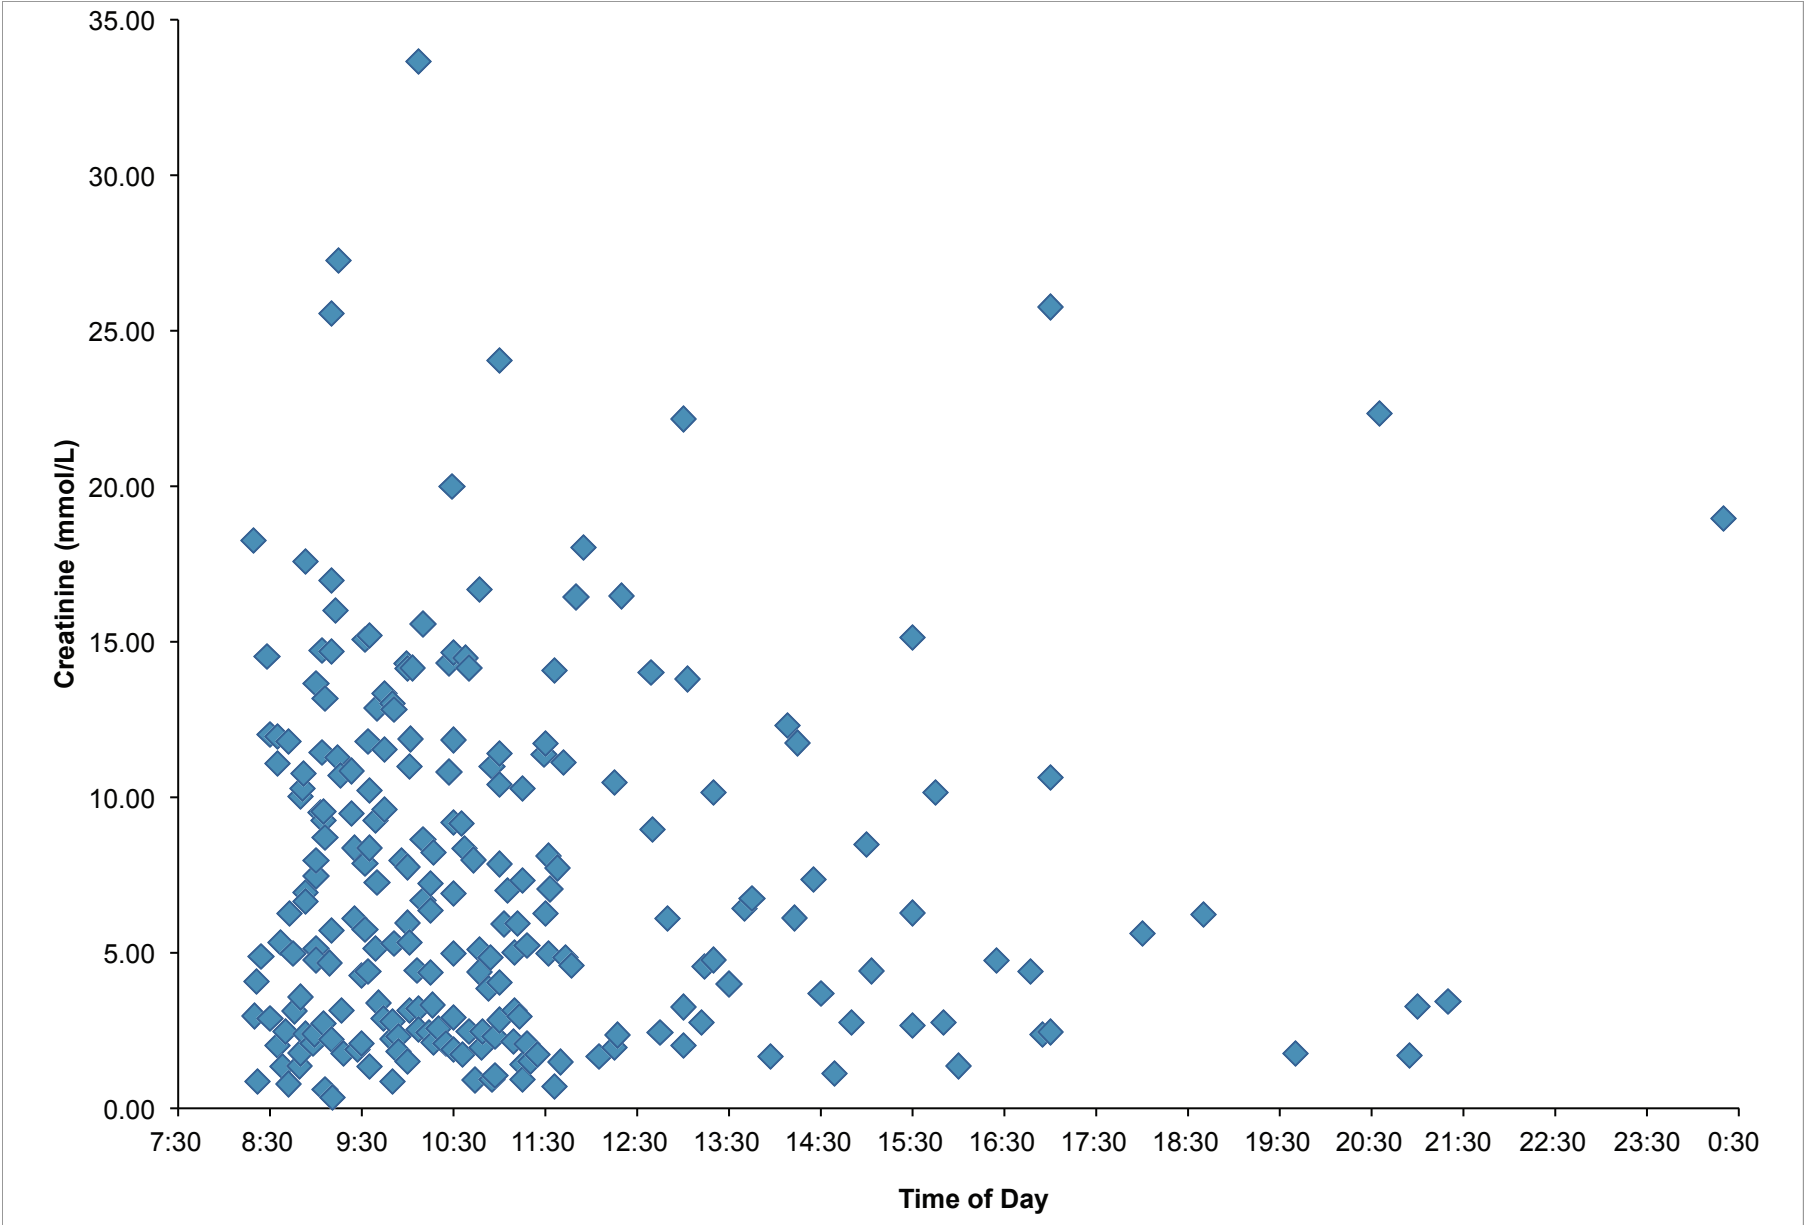

Supplement: MOESM7 [file 9458240]
